# Supplementary material
Source: PubMed Central journal article supplement (PMC4503513)

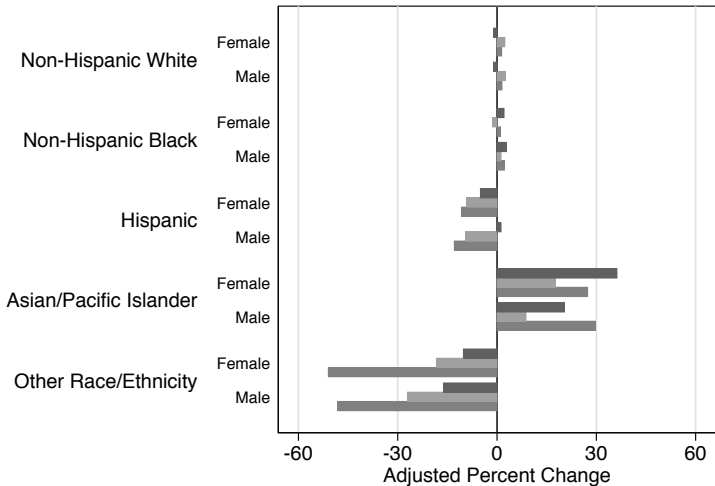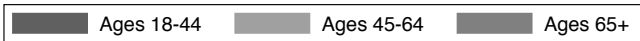

Supplement: NIHMS692258-supplement-Supplemental_Data_File_1___doc___tif__pdf__etc__.pdf [file NIHMS692258-supplement-Supplemental_Data_File_1___doc___tif__pdf__etc__.pdf]

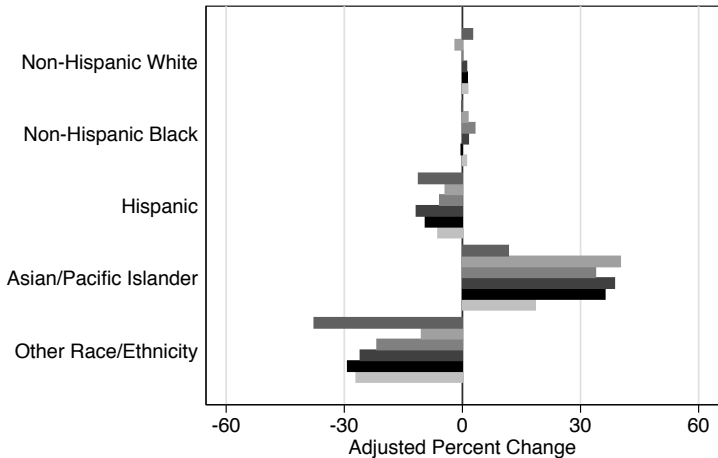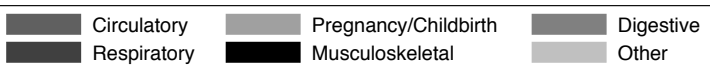

Supplement: NIHMS692258-supplement-Supplemental_Data_File_2___doc___tif__pdf__etc__.pdf [file NIHMS692258-supplement-Supplemental_Data_File_2___doc___tif__pdf__etc__.pdf]
